# Supplementary material for: Using a Train-the-Trainer Model and Active Learning to Reach Biology Freshmen
Source: MDPI journal article supplement (doi:10.3390/jcm12113656), 2013-01-01
Supplement: s1 [file s1]

**Table S1.** Tumor-board recommendation of adjuvant (after resection) or palliative chemotherapy.

| Group            | Total (%)<br>N = 863 | Chemotherapy (%)<br>N = 797 | No Chemotherapy (%)<br>N = 28 | Unknown (%)<br>N = 38 |
|------------------|----------------------|-----------------------------|-------------------------------|-----------------------|
| Resected         | 464 (53.8)           | 408 (47.3)                  | 18 (2.1)                      | 38 (4.4)              |
| Locally advanced | 86 (10.0)            | 80 (9.3)                    | 6 (0.7)                       | 0 (0.0)               |
| Metastasized     | 313 (36.2)           | 309 (35.8)                  | 4 (0.4)                       | 0 (0.0)               |

**Table S2.** Descriptive statistics of study cohort with respect to active smoking.

| Factor                     | Overall (%)<br>N = 512 <sup>1</sup>           | Active Smoking (%)<br>N = 215                 | No Smoking (%)<br>N = 297                     |
|----------------------------|-----------------------------------------------|-----------------------------------------------|-----------------------------------------------|
| <b>Age (years), median</b> | 66 (28 – 94)<br>(67    64    64) <sup>2</sup> | 63 (34 – 85)<br>(63    62    63) <sup>2</sup> | 67 (28 – 89)<br>(69    66    65) <sup>2</sup> |
| <b>Sex</b>                 |                                               |                                               |                                               |
| Female                     | 215 (42.0)<br>(128    19    68) <sup>3</sup>  | 74 (14.5)<br>(29    10    35) <sup>3</sup>    | 141 (27.5)<br>(99    9    33) <sup>3</sup>    |
| Male                       | 297 (58.0)<br>(164    32    101) <sup>3</sup> | 141 (27.5)<br>(67    14    60) <sup>3</sup>   | 156 (30.5)<br>(97    18    41) <sup>3</sup>   |
| <b>ECOG</b>                |                                               |                                               |                                               |
| ≥ 2                        | 65 (12.7)<br>(8    13    44) <sup>3</sup>     | 35 (6.8)<br>(5    5    25) <sup>3</sup>       | 30 (5.9)<br>(3    8    19) <sup>3</sup>       |
| < 2                        | 260 (50.8)<br>(135    30    95) <sup>3</sup>  | 115 (22.5)<br>(46    13    56) <sup>3</sup>   | 145 (28.3)<br>(89    17    39) <sup>3</sup>   |
| Unknown                    | 187 (36.5)<br>(149    8    30) <sup>3</sup>   | 65 (12.7)<br>(45    6    14) <sup>3</sup>     | 122 (23.8)<br>(104    2    16) <sup>3</sup>   |
| <b>Stage</b>               |                                               |                                               |                                               |
| Resected                   | 292 (57.0)                                    | 96 (18.8)                                     | 196 (38.2)                                    |
| Locally advanced           | 51 (10.0)                                     | 24 (4.7)                                      | 27 (5.3)                                      |
| Metastasized               | 169 (33.0)                                    | 95 (18.6)                                     | 74 (14.4)                                     |
| <b>Localization</b>        |                                               |                                               |                                               |
| Head                       | 291 (56.8)                                    | 116 (22.7)                                    | 175 (34.1)                                    |
| Body                       | 50 (9.8)                                      | 20 (4.0)                                      | 30 (5.8)                                      |
| Tail                       | 70 (13.7)                                     | 30 (5.9)                                      | 40 (7.8)                                      |
| Overlap                    | 29 (5.7)                                      | 15 (2.9)                                      | 14 (2.8)                                      |
| Not specified              | 72 (14.0)                                     | 34 (6.6)                                      | 38 (7.4)                                      |
| <b>Treatment</b>           |                                               |                                               |                                               |
| Resection                  |                                               |                                               |                                               |
| R0                         | 195 (38.1)                                    | 68 (13.3)                                     | 127 (24.8)                                    |
| R1                         | 87 (16.9)                                     | 24 (4.7)                                      | 63 (12.2)                                     |
| R2                         | 2 (0.4)                                       | 0 (0.0)                                       | 2 (0.4)                                       |
| RX                         | 8 (1.6)                                       | 4 (0.8)                                       | 4 (0.8)                                       |
| Palliative Treatment       | 220 (43.0)                                    | 119 (23.2)                                    | 101 (19.8)                                    |

<sup>1</sup> in the case of 351 out of 863 patients smoking status was unknown; <sup>2</sup> average age of sub-groups (resected || locally advanced || metastasized); <sup>3</sup> absolute number of cases in sub-groups (resected || locally advanced || metastasized).

**Table S3.** Descriptive statistics of study cohort with respect to BMI.

| Factor                     | Overall (%)<br>N = 863                        | BMI < 22 (%)<br>N = 226                       | BMI ≥ 22 (%)<br>N = 637                       |
|----------------------------|-----------------------------------------------|-----------------------------------------------|-----------------------------------------------|
| <b>Age (years), median</b> | 66 (28 – 94)<br>(67    68    66) <sup>2</sup> | 66 (28 – 85)<br>(65    63    61) <sup>2</sup> | 69 (37 – 94)<br>(67    68    66) <sup>2</sup> |

|                      |                                               |                                             |                                               |
|----------------------|-----------------------------------------------|---------------------------------------------|-----------------------------------------------|
| <b>Sex</b>           |                                               |                                             |                                               |
| Female               | 377 (43.7)<br>(206    35    136) <sup>3</sup> | 126 (14.6)<br>(61    14    51) <sup>3</sup> | 251 (29.1)<br>(145    21    85) <sup>3</sup>  |
| Male                 | 486 (56.3)<br>(258    51    177) <sup>3</sup> | 100 (11.6)<br>(46    11    43) <sup>3</sup> | 386 (44.7)<br>(212    40    134) <sup>3</sup> |
| <b>ECOG</b>          |                                               |                                             |                                               |
| ≥ 2                  | 123 (14.3)<br>(13    25    85) <sup>3</sup>   | 34 (3.9)<br>(3    7    24) <sup>3</sup>     | 89 (10.4)<br>(10    18    61) <sup>3</sup>    |
| < 2                  | 418 (48.4)<br>(203    46    169) <sup>3</sup> | 113 (13.1)<br>(55    9    49) <sup>3</sup>  | 305 (35.3)<br>(148    37    120) <sup>3</sup> |
| Unknown              | 322 (37.3)<br>(248    15    59) <sup>3</sup>  | 79 (9.2)<br>(49    9    21) <sup>3</sup>    | 243 (28.1)<br>(199    6    38) <sup>3</sup>   |
| <b>Stage</b>         |                                               |                                             |                                               |
| Resected             | 464 (53.7)                                    | 107 (12.4)                                  | 357 (41.3)                                    |
| Locally advanced     | 86 (10.0)                                     | 25 (2.9)                                    | 61 (7.1)                                      |
| Metastasized         | 313 (36.3)                                    | 94 (10.9)                                   | 219 (25.4)                                    |
| <b>Localization</b>  |                                               |                                             |                                               |
| Head                 | 494 (57.3)                                    | 121 (14.1)                                  | 373 (43.2)                                    |
| Body                 | 78 (9.0)                                      | 18 (2.0)                                    | 60 (7.0)                                      |
| Tail                 | 117 (13.6)                                    | 33 (3.7)                                    | 84 (9.9)                                      |
| Overlap              | 45 (5.2)                                      | 13 (1.5)                                    | 32 (3.7)                                      |
| Not specified        | 129 (14.9)                                    | 41 (4.8)                                    | 88 (10.1)                                     |
| <b>Treatment</b>     |                                               |                                             |                                               |
| Resection            |                                               |                                             |                                               |
| R0                   | 304 (35.2)                                    | 71 (8.2)                                    | 233 (27.0)                                    |
| R1                   | 139 (16.1)                                    | 32 (3.7)                                    | 107 (12.4)                                    |
| R2                   | 2 (0.2)                                       | 0 (0.0)                                     | 2 (0.2)                                       |
| RX                   | 19 (2.2)                                      | 13 (1.5)                                    | 6 (0.7)                                       |
| Palliative Treatment | 399 (46.3)                                    | 110 (12.7)                                  | 289 (33.6)                                    |

<sup>2</sup> average age of sub-groups (resected || locally advanced || metastasized); <sup>3</sup> absolute number of cases in sub-groups (resected || locally advanced || metastasized); BMI – body mass index (kg/m<sup>2</sup>).

**Table S4.** Descriptive statistics of study cohort with respect to GFR.

| Factor                     | Overall (%)<br>N = 863                        | GFR < 90 (%)<br>N = 423                       | GFR ≥ 90 (%)<br>N = 440                       |
|----------------------------|-----------------------------------------------|-----------------------------------------------|-----------------------------------------------|
| <b>Age (years), median</b> | 67 (28 – 94)<br>(67    68    66) <sup>2</sup> | 70 (35 – 94)<br>(71    71    69) <sup>2</sup> | 62 (28 – 84)<br>(63    62    60) <sup>2</sup> |
| <b>Sex</b>                 |                                               |                                               |                                               |
| Female                     | 377 (43.7)<br>(206    35    136) <sup>3</sup> | 240 (27.8)<br>(133    17    90) <sup>3</sup>  | 137 (15.9)<br>(73    18    46) <sup>3</sup>   |
| Male                       | 486 (56.3)<br>(258    51    177) <sup>3</sup> | 183 (21.2)<br>(96    25    62) <sup>3</sup>   | 303 (35.1)<br>(162    26    115) <sup>3</sup> |
| <b>ECOG</b>                |                                               |                                               |                                               |
| ≥ 2                        | 123 (14.3)<br>(13    25    85) <sup>3</sup>   | 66 (7.7)<br>(7    13    46) <sup>3</sup>      | 57 (6.6)<br>(6    12    39) <sup>3</sup>      |
| < 2                        | 418 (48.4)<br>(203    46    169) <sup>3</sup> | 205 (23.8)<br>(97    24    84) <sup>3</sup>   | 213 (24.6)<br>(106    22    85) <sup>3</sup>  |
| Unknown                    | 322 (37.3)<br>(248    15    59) <sup>3</sup>  | 152 (17.6)<br>(125    5    22) <sup>3</sup>   | 170 (19.7)<br>(123    10    37) <sup>3</sup>  |
| <b>Stage</b>               |                                               |                                               |                                               |
| Resected                   | 464 (53.7)                                    | 229 (26.5)                                    | 235 (27.2)                                    |

|                      |            |            |            |
|----------------------|------------|------------|------------|
| Locally advanced     | 86 (10.0)  | 42 (4.9)   | 44 (5.1)   |
| Metastasized         | 313 (36.3) | 152 (17.6) | 161 (18.7) |
| <b>Localization</b>  |            |            |            |
| Head                 | 494 (57.3) | 240 (27.8) | 254 (29.4) |
| Body                 | 78 (9.0)   | 40 (4.6)   | 38 (4.4)   |
| Tail                 | 117 (13.6) | 68 (7.9)   | 49 (5.7)   |
| Overlap              | 45 (5.2)   | 21 (2.4)   | 24 (2.8)   |
| Not specified        | 129 (14.9) | 54 (6.3)   | 75 (8.7)   |
| <b>Treatment</b>     |            |            |            |
| Resection            |            |            |            |
| R0                   | 304 (35.2) | 155 (18.0) | 149 (17.2) |
| R1                   | 139 (16.1) | 68 (7.9)   | 71 (8.2)   |
| R2                   | 2 (0.2)    | 1 (0.1)    | 1 (0.1)    |
| RX                   | 19 (2.2)   | 7 (0.8)    | 12 (1.4)   |
| Palliative Treatment | 399 (46.3) | 192 (22.2) | 207 (24.1) |

<sup>2</sup> average age of sub-groups (resected||locally advanced||metastasized); <sup>3</sup> absolute number of cases in sub-groups (resected||locally advanced||metastasized); GFR - glomerular filtration rate ((ml/min/1.37m<sup>2</sup>).

**Table S5.** Univariate and multivariate logistic regression analyses for mOS.

| Factor                | Univariate analysis |      |             |         | Multivariate analysis |            |         |  |
|-----------------------|---------------------|------|-------------|---------|-----------------------|------------|---------|--|
|                       | N                   | HR   | 95% CI      | P-value | HR                    | 95% CI     | P-value |  |
| <b>Age (years)</b>    |                     |      |             |         |                       |            |         |  |
| ≥ 65                  | 503                 |      |             |         |                       |            |         |  |
| < 65                  | 360                 | 0.7  | 0.59 – 0.83 | < 0.001 | 1.8                   | 1.4 – 2.4  | < 0.001 |  |
| <b>Sex</b>            |                     |      |             |         |                       |            |         |  |
| Female                | 377                 |      |             |         |                       |            |         |  |
| Male                  | 486                 | 1.3  | 1.1 - 1.5   | < 0.001 | 2.0                   | 1.5 – 2.7  | < 0.001 |  |
| <b>Tumor stage</b>    |                     |      |             |         |                       |            |         |  |
| Resected              | 464                 |      |             |         |                       |            |         |  |
| Locally advanced      | 86                  | 1.8  | 1.4 – 2.3   | < 0.001 | 2.1                   | 1.4 – 3.1  | < 0.001 |  |
| Metastasized          | 313                 | 2.6  | 2.1 – 3.1   | < 0.001 | 2.7                   | 2.1 - 3.7  | < 0.001 |  |
| <b>Localization</b>   |                     |      |             |         |                       |            |         |  |
| Head                  | 494                 |      |             |         |                       |            |         |  |
| Body                  | 78                  | 0.89 | 0.66 – 1.2  | 0.442   | 1.0                   | 0.7 - 1.6  | 0.752   |  |
| Tail                  | 117                 | 1.20 | 0.93 – 1.5  | 0.155   | 1.1                   | 0.8 - 1.6  | 0.561   |  |
| Overlap               | 45                  | 1.56 | 1.10 – 2.2  | 0.016   | 1.2                   | 0.8 – 2.1  | 0.322   |  |
| Not specified         | 129                 | 1.54 | 1.24 – 1.9  | < 0.001 | 1.4                   | 1.0 – 2.0  | 0.033   |  |
| <b>CA19-9 (kU/l)</b>  |                     |      |             |         |                       |            |         |  |
| ≥ 300                 | 358                 |      |             |         |                       |            |         |  |
| < 300                 | 390                 | 0.53 | 0.44 – 0.63 | < 0.001 | 0.6                   | 0.5 – 0.8  | 0.0005  |  |
| Unknown               | 115                 |      |             |         |                       |            |         |  |
| <b>ECOG</b>           |                     |      |             |         |                       |            |         |  |
| > 2                   | 123                 |      |             |         |                       |            |         |  |
| 0 - 1                 | 418                 | 0.53 | 0.42 – 0.6  | < 0.001 | 0.6                   | 0.4 – 0.8  | 0.002   |  |
| Unknown               | 322                 |      |             |         |                       |            |         |  |
| <b>Albumin (g/l)</b>  |                     |      |             |         |                       |            |         |  |
| ≥ 33                  | 345                 |      |             |         |                       |            |         |  |
| < 33                  | 518                 | 1.4  | 1.2 – 1.7   | < 0.001 | 1.5                   | 0.5 – 0.8  | 0.0009  |  |
| <b>Active Smoking</b> |                     |      |             |         |                       |            |         |  |
| Yes                   | 215                 |      |             |         |                       |            |         |  |
| No                    | 297                 | 0.69 | 0.55 – 0.86 | < 0.001 | 0.7                   | 0.61 - 1.0 | 0.056   |  |

|                     |     |      |            |       |                  |                        |                    |
|---------------------|-----|------|------------|-------|------------------|------------------------|--------------------|
| Unknown             | 351 |      |            |       |                  |                        |                    |
| <b>BMI</b>          |     |      |            |       |                  |                        |                    |
| ≥ 22                | 637 |      |            |       |                  |                        |                    |
| < 22                | 226 | 1.2  | 1.0 – 1.5  | 0.018 | 1.2              | 0.89 - 1.6             | 0.250              |
|                     |     |      |            |       | 0.7 <sup>1</sup> | 0.44-1.04 <sup>1</sup> | 0.078 <sup>1</sup> |
| <b>Diabetes</b>     |     |      |            |       |                  |                        |                    |
| Yes                 | 308 |      |            |       |                  |                        |                    |
| No                  | 555 | 1.0  | 0.85 – 1.2 | 0.970 | 1.1              | 0.86 - 1.5             | 0.386              |
| <b>Hypertension</b> |     |      |            |       |                  |                        |                    |
| Yes                 | 507 |      |            |       |                  |                        |                    |
| No                  | 356 | 0.91 | 0.77 – 1.1 | 0.260 | 1.2              | 0.90 – 1.5             | 0.227              |
| <b>GFR</b>          |     |      |            |       |                  |                        |                    |
| ≥ 90                | 440 |      |            |       |                  |                        |                    |
| < 90                | 423 | 1.1  | 0.97 – 1.3 | 0.002 | 1.4              | 1.0 - 1.8              | 0.033              |

<sup>1</sup> multivariate analysis for the resected group only, excluding locally advanced and metastasized pts; BMI – body mass index (kg/m<sup>2</sup>); GFR – glomerular filtration rate (GFR, ml/min/1.37m<sup>2</sup>).

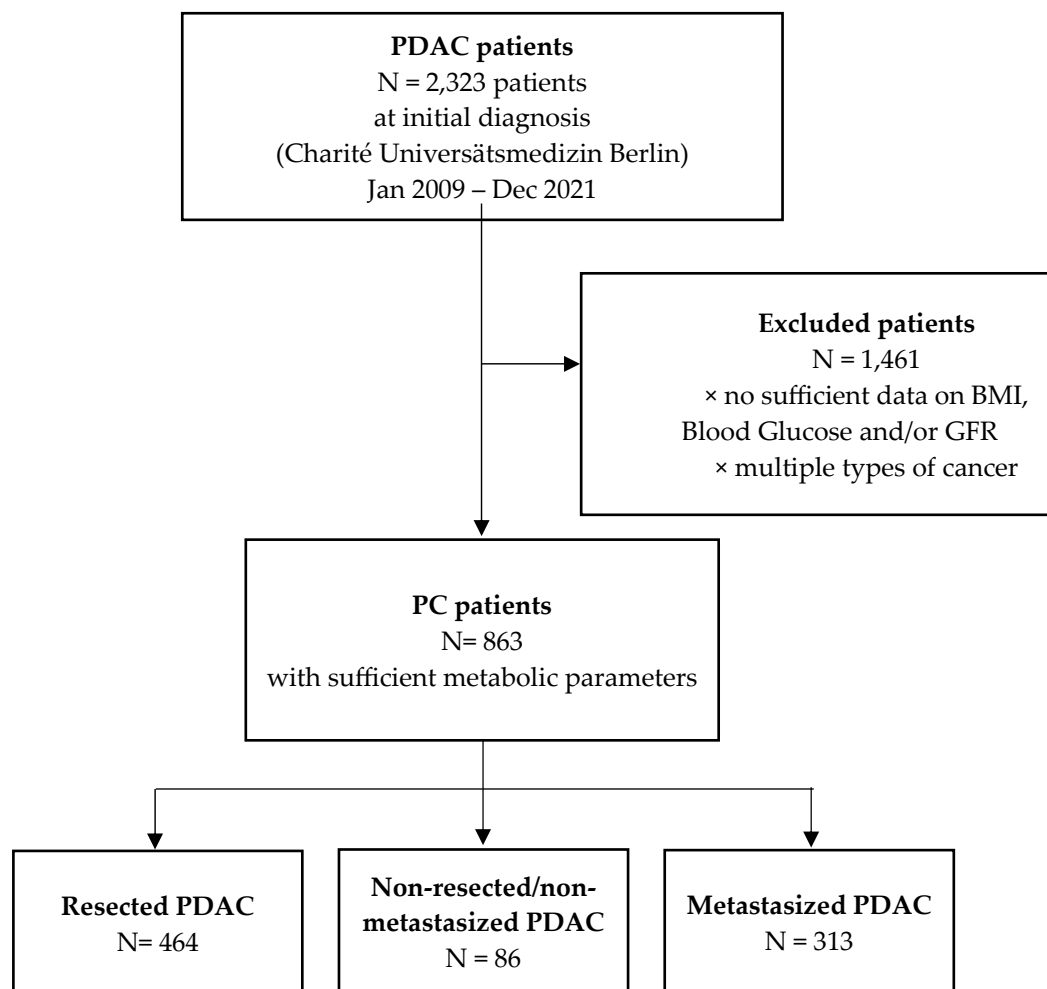

PDAC – pancreatic cancer.

**Figure S1.** Study flow chart.

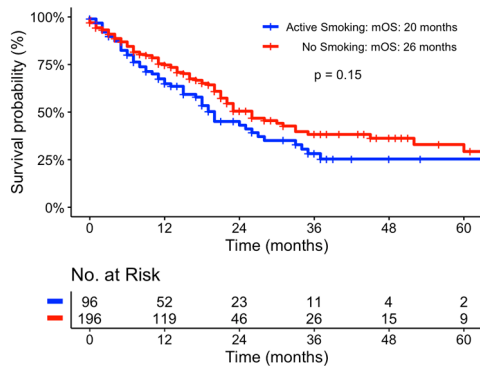

(a)

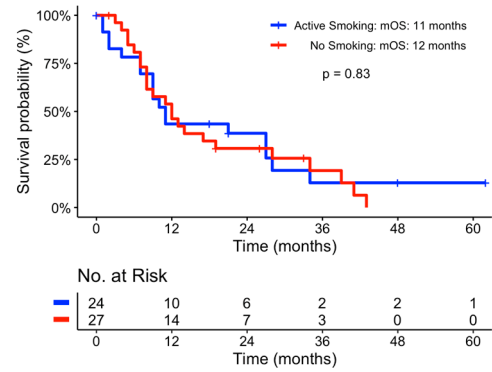

(b)

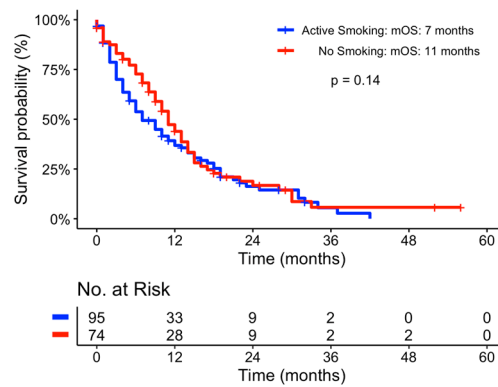

(c)

**Figure S2.** Kaplan-Meier Curves univariate comparison of sub-group analyses of active smoking: (a) resected patients; (b) locally advanced; (c) metastasized patients.

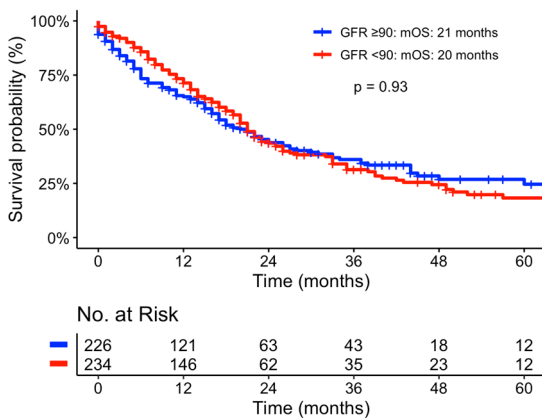

(a)

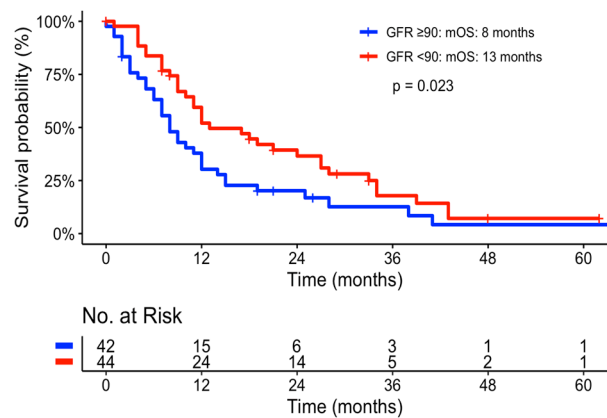

(b)

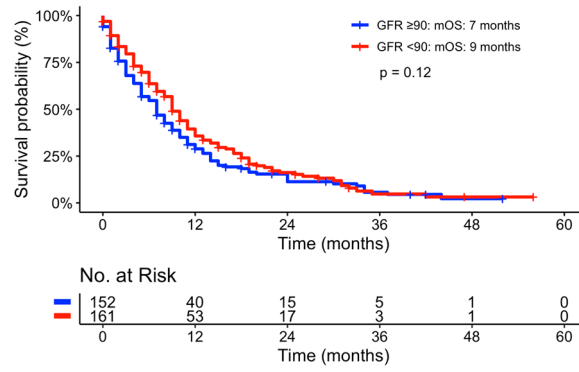

(c)

**Figure S3.** Kaplan-Meier Curves univariate comparison of sub-group analyses of GFR: (a) resected patients; (b) locally advanced; (c) metastasized patients.

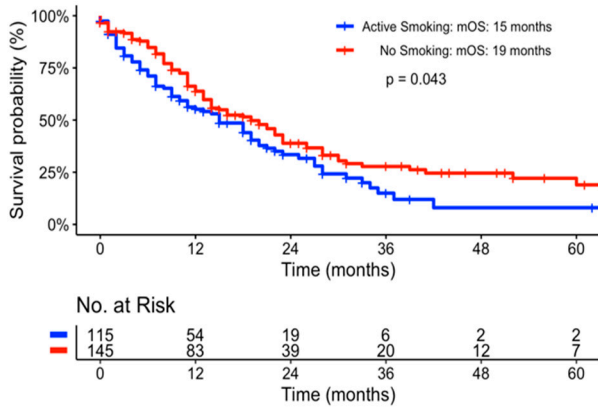

(a)

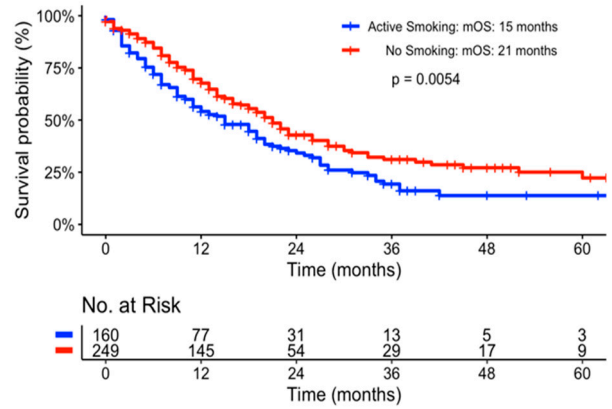

(b)

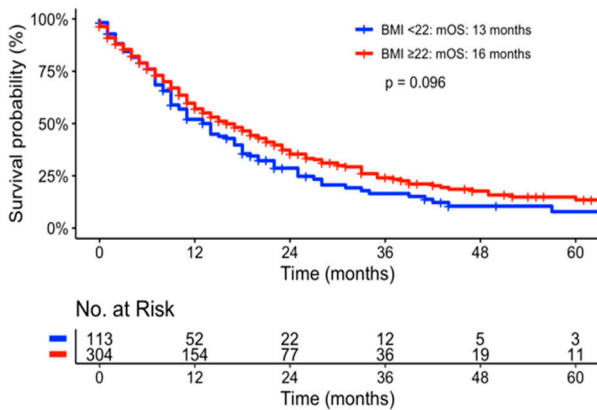

(c)

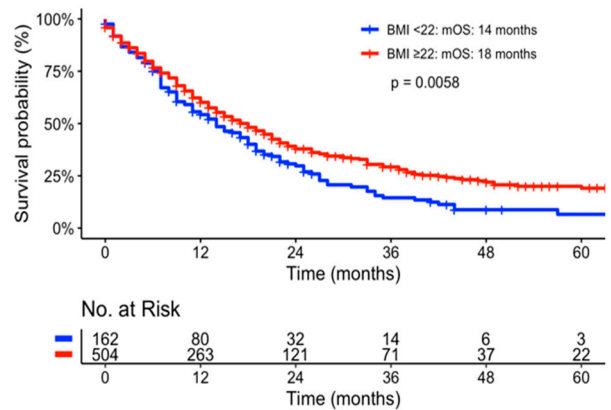

(d)

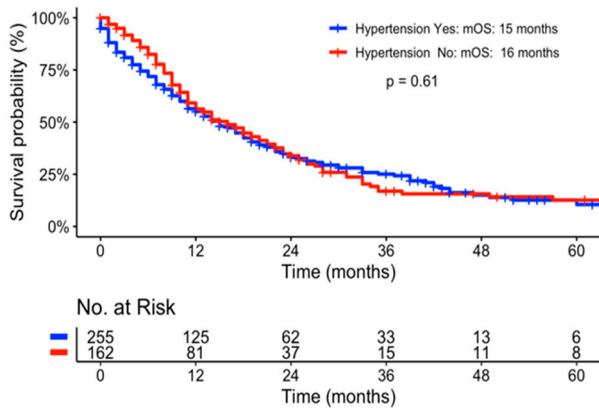

(e)

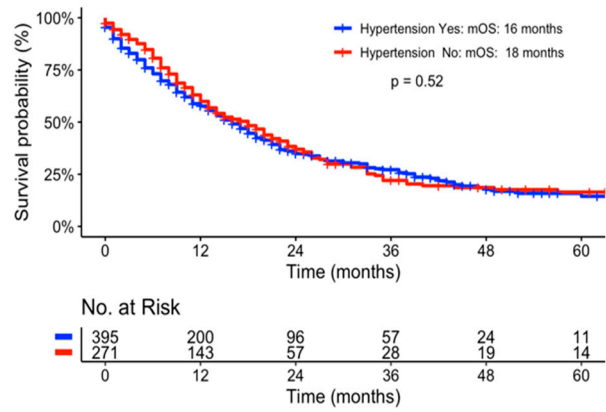

(f)

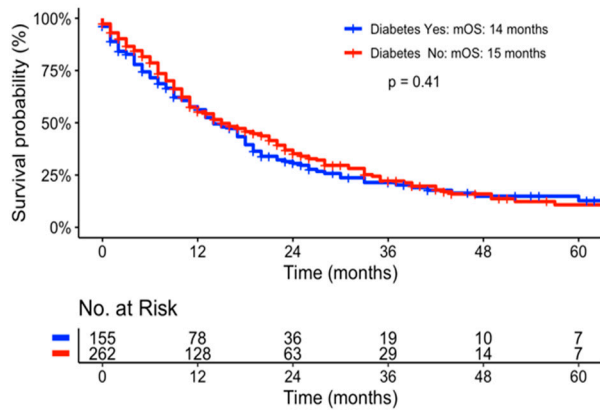

(g)

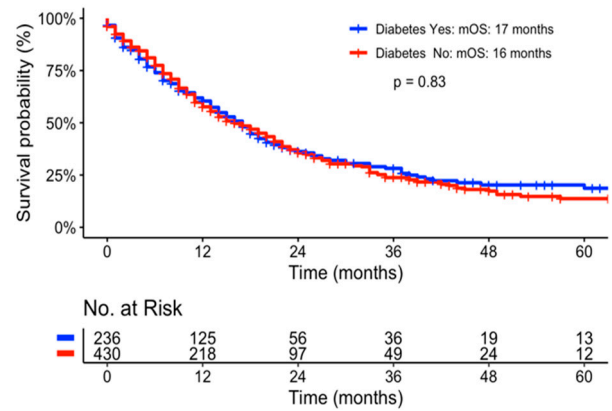

(h)

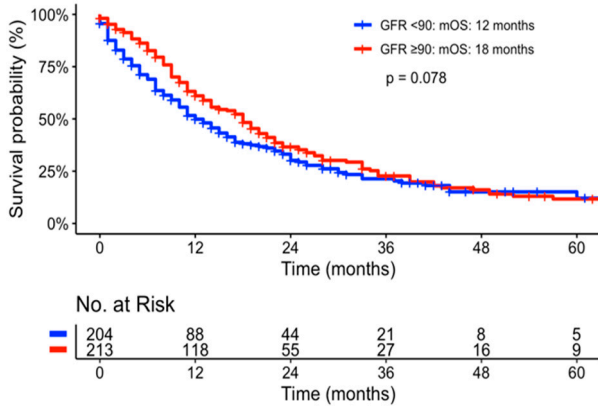

(i)

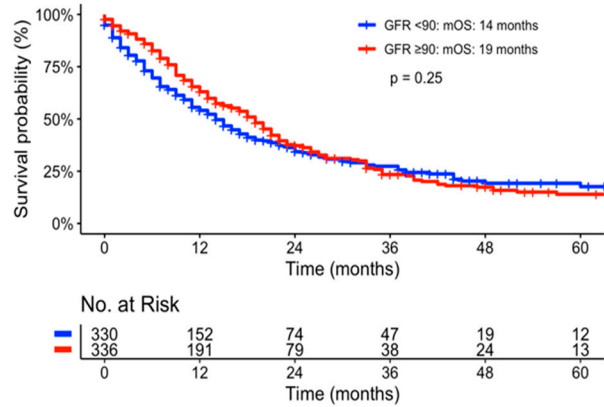

(j)

**Figure S4.** Kaplan-Meier Curves univariate comparison of sub-group analyses for ECOG status 0-1 for non-imputed data using Table S5 of: (a) Smoking; (c) BMI; (e) Hypertension; (g) Diabetes; (i) GFR. Kaplan-Meier Curves univariate comparison of sub-group analyses for ECOG status 0-1 for imputed data using Table 2 of: (b) Smoking; (d) BMI; (f) Hypertension; (h) Diabetes; (j) GFR.

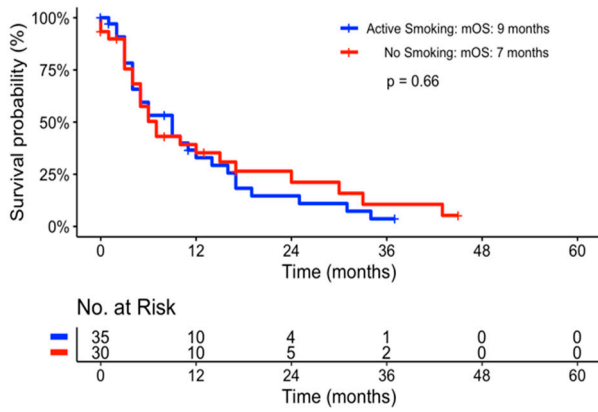

(a)

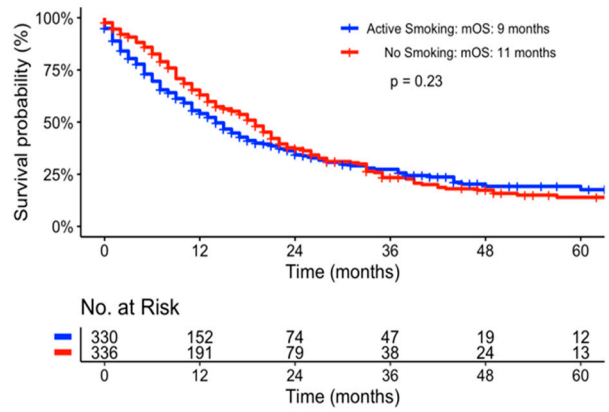

(b)

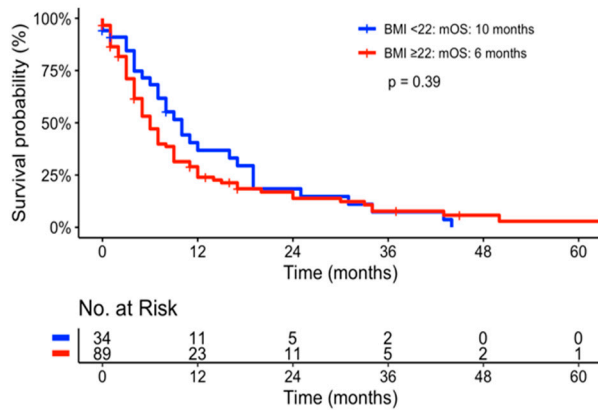

(c)

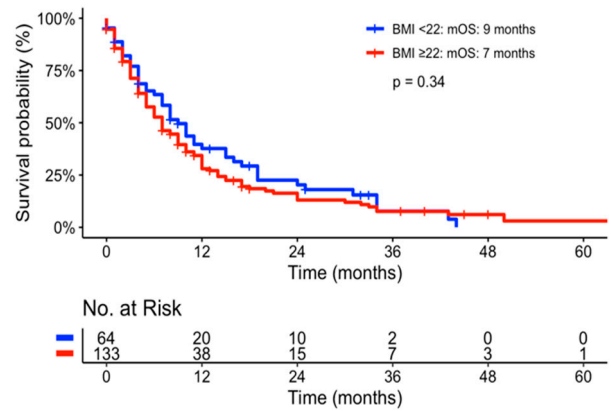

(d)

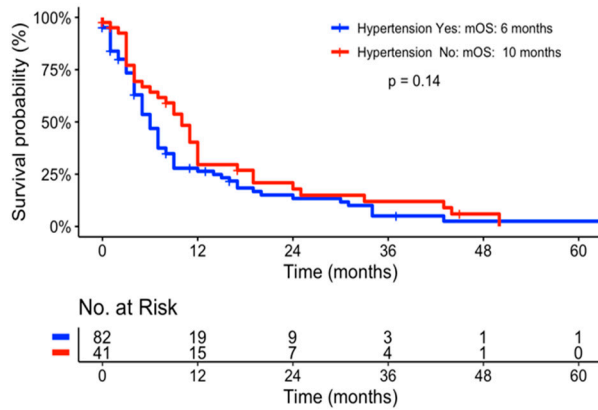

(e)

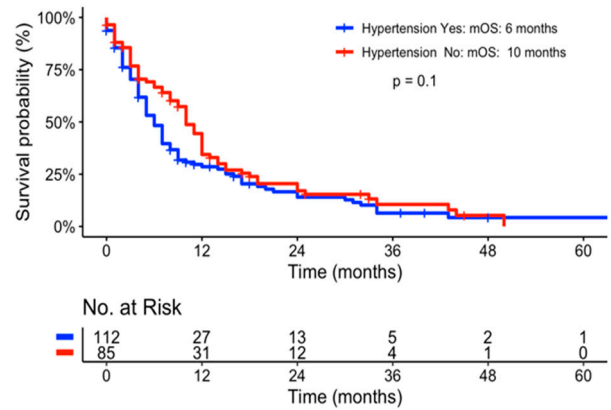

(f)

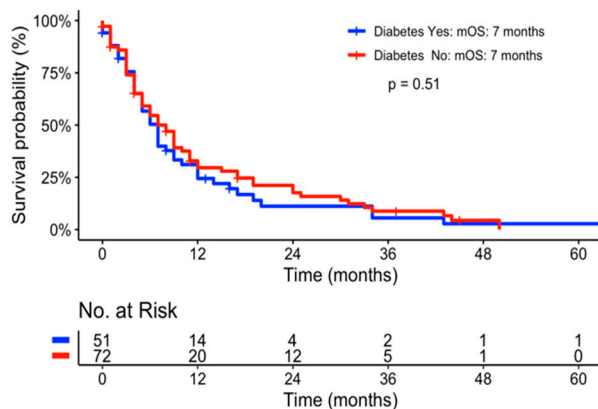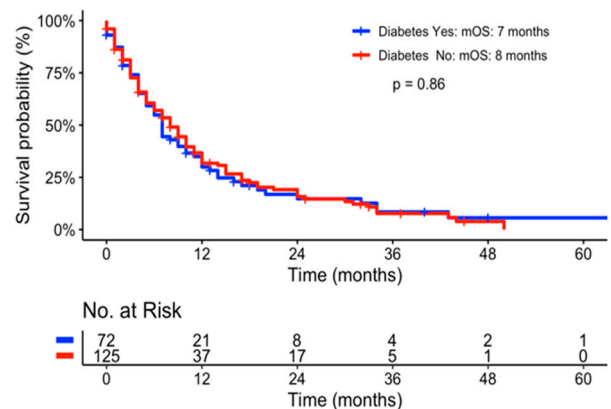



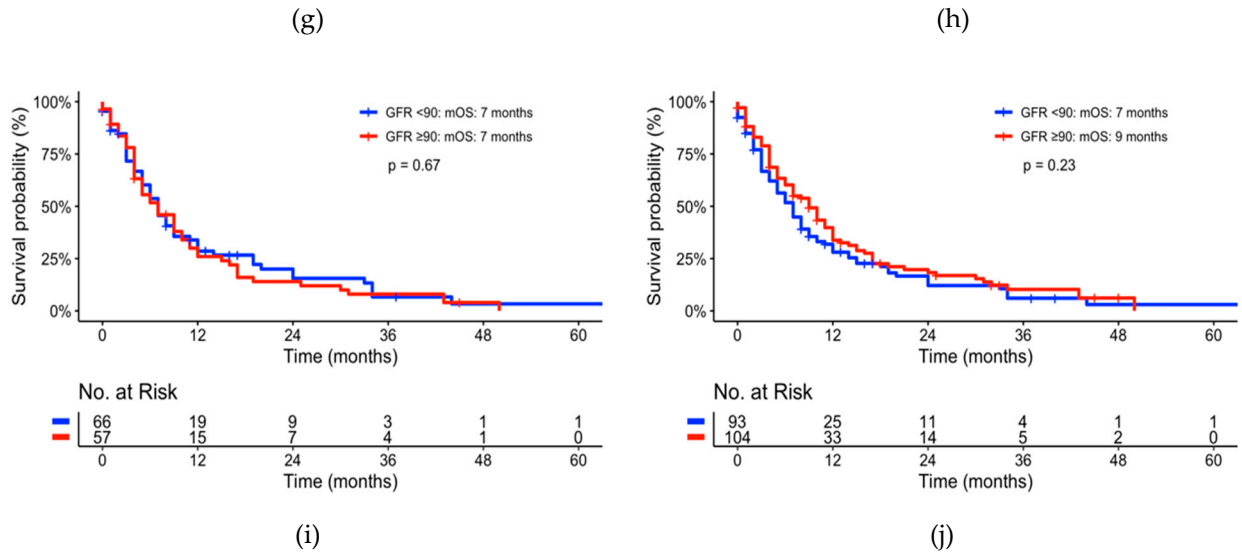

**Figure S5.** Kaplan-Meier Curves univariate comparison of sub-group analyses for ECOG status  $\geq 2$  for non-imputed data using Table S5 of: (a) Smoking; (c) BMI; (e) Hypertension; (g) Diabetes; (i) GFR. Kaplan-Meier Curves univariate comparison of sub-group analyses for ECOG status 0-1 for imputed data using Table 2 of: (b) Smoking; (d) BMI; (f) Hypertension; (h) Diabetes; (j) GFR.
